# Supplementary material
Source: Springer Nature journal article supplement (https://www.springermedizin.de/resource/supplementary/13058_2013_3402_MOESM1_ESM.pdf/9704062)
Supplement: MOESM1 [file 9704062]

Additional file 1 Complete case analysis of breast cancer-specific mortality according to smoking exposure at time of diagnosis among 4,334 women with invasive breast cancer (1987-2008)

| Smoking status                       | Breast cancer-specific mortality |        |                  |                               |                          |
|--------------------------------------|----------------------------------|--------|------------------|-------------------------------|--------------------------|
|                                      | Number of                        |        | Crude HR         | Age <sup>a</sup> -adjusted HR | Adjusted <sup>b</sup> HR |
|                                      | Women                            | Deaths | (95% CI)         | (95% CI)                      | (95% CI)                 |
| Never <sup>c</sup>                   | 2,517                            | 401    | 1.00             | 1.00                          | 1.00                     |
| Former                               | 986                              | 126    | 0.89 (0.73-1.09) | 0.94 (0.77-1.15)              | 0.99 (0.81-1.22)         |
| Current <sup>d</sup>                 | 831                              | 138    | 1.00 (0.82-1.21) | 0.98 (0.81-1.20)              | 1.11 (0.91-1.36)         |
| ≤15 pack years                       | 177                              | 28     | 0.77 (0.53-1.14) | 0.69 (0.47-1.02)              | 0.84 (0.57-1.25)         |
| >15 to ≤30 pack years                | 218                              | 43     | 1.11 (0.81-1.53) | 1.07 (0.78-1.47)              | 1.18 (0.85-1.63)         |
| >30 pack years                       | 212                              | 42     | 1.18 (0.86-1.62) | 1.32 (0.96-1.82)              | 1.45 (1.05-2.02)         |
| P-value, test for trend <sup>e</sup> |                                  |        | 0.10             | 0.01                          | 0.01                     |
| ≤10 cigarettes/day                   | 209                              | 28     | 0.85 (0.58-1.25) | 0.82 (0.56-1.21)              | 1.07 (0.72-1.57)         |
| >10 to ≤20 cigarettes/day            | 313                              | 54     | 0.98 (0.74-1.30) | 0.98 (0.73-1.30)              | 1.07 (0.79-1.43)         |
| >20 cigarettes/day                   | 258                              | 53     | 1.22 (0.91-1.62) | 1.21 (0.90-1.61)              | 1.20 (0.89-1.62)         |
| P-value, test for trend <sup>e</sup> |                                  |        | 0.13             | 0.14                          | 0.28                     |
| ≤20 years                            | 150                              | 32     | 1.00 (0.70-1.44) | 0.82 (0.56-1.18)              | 0.91 (0.62-1.33)         |
| 21 to 30 years                       | 196                              | 36     | 0.94 (0.67-1.32) | 0.89 (0.63-1.26)              | 1.03 (0.72-1.46)         |
| >30 years                            | 265                              | 46     | 1.13 (0.83-1.53) | 1.33 (0.98-1.81)              | 1.54 (1.12-2.12)         |
| P-value, test for trend <sup>e</sup> |                                  |        | 0.57             | 0.08                          | 0.009                    |

Abbreviations: HR, hazard ratio; CI, confidence interval.

a HRs adjusted for age at diagnosis (≤39, 40-49, 50-59, 60-69, ≥70 years).

b HRs adjusted for age at diagnosis (≤39, 40-49, 50-59, 60-69, ≥70 years), year of diagnosis (≤1994, 1995-1999, 2000-2004, ≥2005), age at menarche (≤11, 12, 13, ≥14 years), parity (0, 1, 2, ≥3), menopausal status (premenopausal, postmenopausal), current hormone replacement therapy use (yes, no), first degree family history of breast cancer (yes, no), estrogen and progesterone receptors positivity (positive, negative, not investigated), histological grade (well, moderately, poorly differentiated), size of the tumor (≤10, 11-20, 21-30, 31-40, >40 mm, no pathological investigation), regional or distant involvement (node-negative, 1-3 positive nodes, ≥4 positive nodes, unknown nodal involvement, distant metastases), locoregional treatment (mastectomy, breast-conserving surgery, no surgery), neoadjuvant therapy (yes, no), adjuvant endocrine therapy (yes, no), adjuvant chemotherapy (yes, no).

c Reference category.

d Among the 1,079 current smokers, number of pack years of smoking, number of cigarettes smoked and duration of smoking were unknown for 296, 60 and 290 women, respectively.

e P for trend in hazard ratios comparing current smokers further categorized based on number of pack years of smoking, number of cigarettes smoked daily or duration of smoking, to never smokers.
